# Supplementary material for: Tuning the nanostructure of nitrogen-doped graphene laminates for forward osmosis desalination
Source: Royal Society of Chemistry journal article supplement (doi:10.1039/c9nr06845g), 2019-01-01
Supplement: c9nr06845g1.pdf [file c9nr06845g1.pdf]

## Supplementary Information

### **Tuning the nanostructure of nitrogen-doped graphene laminates for forward osmosis desalination**

**Jun-ho Song<sup>a</sup>, Ho Kyong Shon<sup>b</sup>, Peng Wang<sup>c</sup>, Am Jang<sup>d</sup>, In S. Kim<sup>a,\*</sup>**

<sup>a</sup> *Global Desalination Research Center (GDRC), School of Earth Sciences and Environmental Engineering, Gwangju Institute of Science and Technology (GIST), 123 Cheomdangwagi-ro, Buk-gu, Gwangju, 61005, South Korea*

<sup>b</sup> *School of Civil and Environmental Engineering, University of Technology Sydney (UTS), City Campus, Broadway, NSW 2007, Australia*

<sup>c</sup> *Water Desalination and Reuse Center, Division of Biological and Environmental Science and Engineering, King Abdullah University of Science and Technology, Thuwal, 23955-6900, Saudi Arabia*

<sup>d</sup> *Graduate School of Water Resources, Sungkyunkwan University (SKKU), 2066, Seobu-ro, Jangan-gu, Suwon-si, Gyeonggi-do, 16419, Republic of Korea*

\*Corresponding author. Tel: +82 62 715 2436. E-mail: iskim@gist.ac.kr (In S. Kim).

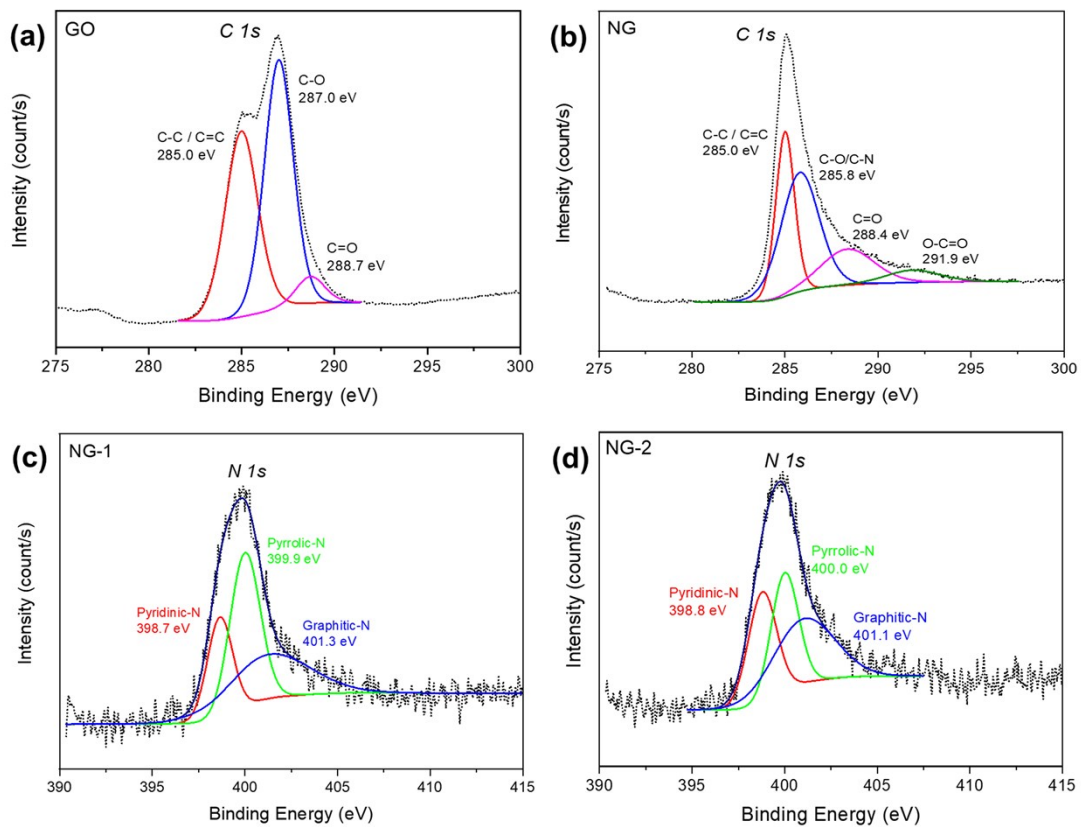

Fig. S1. XPS spectra C1s of (a) GO, and (b) NG powder. N1s of (c) NG-1, and (d) NG-2.

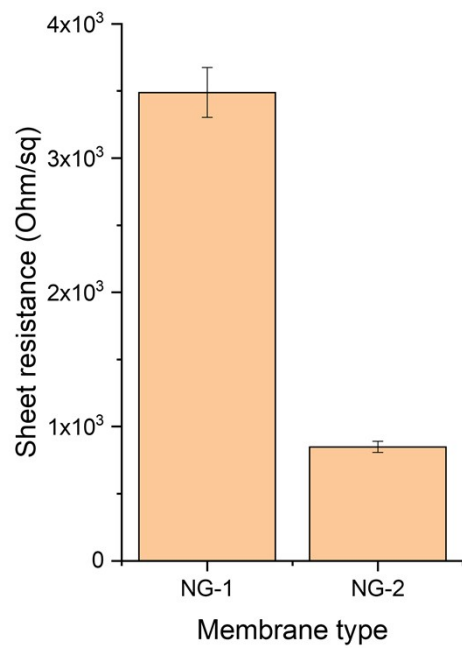

Fig. S2. Sheet resistance of NG-1 and NG-2. GO is insulator ( $\sim 9 \times 10^6 \Omega/\text{sq}$ ).

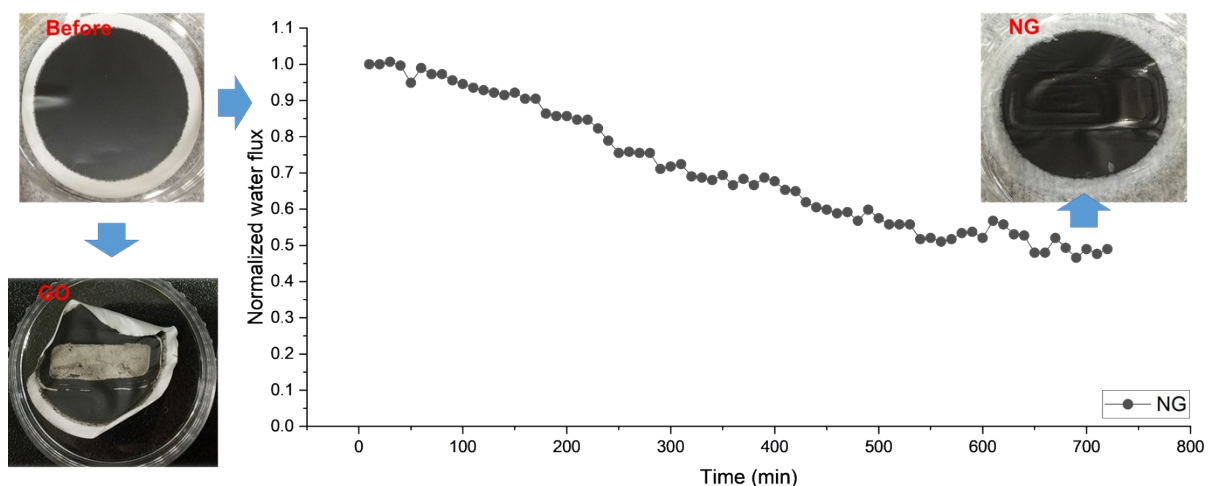

Fig. S3. Photograph of membranes by different condition (before FO testing, and after testing using GO, NG membranes) The GO membrane cannot stand cross-flow system, and sheets falls off in a flash. However, the NG membrane can resist over 12 hours under same condition.

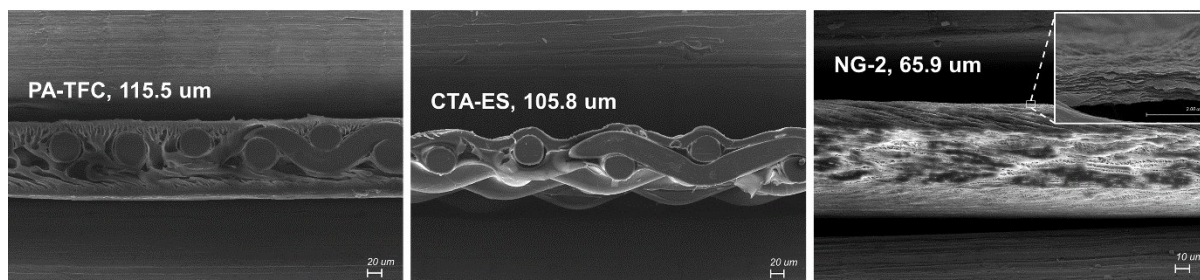

Fig. S4. SEM image (Cross-sectional view) of PA-TFC, CTA-ES, NG-2 membranes.

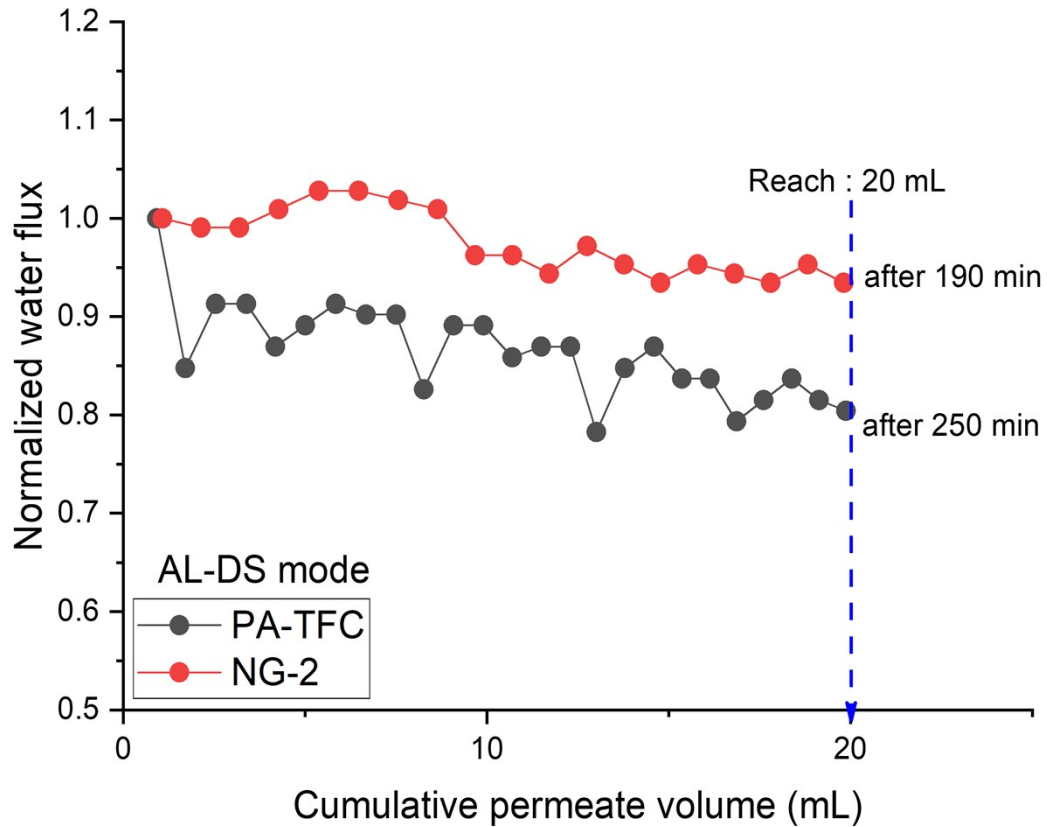

Fig. S5. Normalized water flux of PA-TFC and NG-2 membranes in FO (AL-DS mode) system using DI water and 0.1 M NaCl as a FS and DS. A cumulative permeate volume of 20 mL was achieved after about 190 min for NG-2 and 250 min for PA-TFC. The normalized flux decline of PA-TFC was slightly higher than that of NG-2 membrane, indicating ICP effect. At the same time, the normalized flux of NG-2 did not decrease much, but the decrease of PA-TFC was larger than that of NG-2.
